# Supplementary material
Source: Springer Nature journal article supplement (https://www.springermedizin.de/resource/supplementary/12872_2009_297_MOESM2_ESM.pdf/9429644)

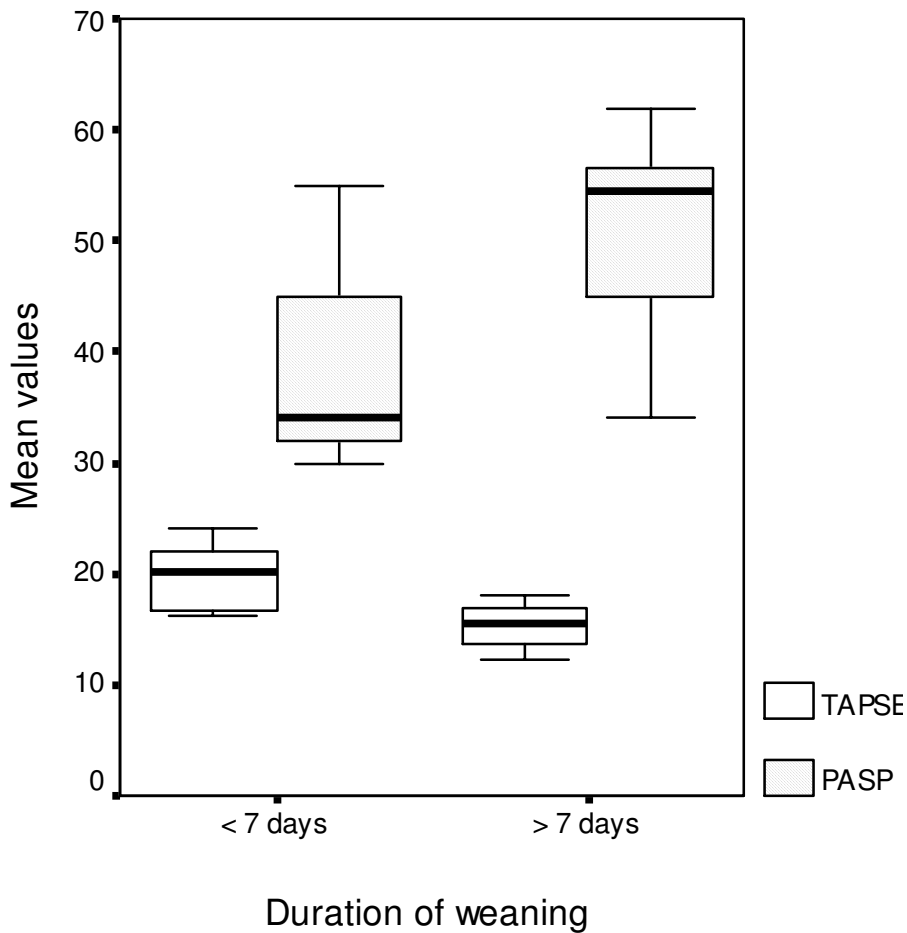

Supplement: MOESM2 [file 9429644]
